# Supplementary material
Source: ML conference proceedings conference paper supplement (https://proceedings.neurips.cc/paper_files/paper/2022/hash/270339c997293ca2988c62f4308e389f-Abstract.html)
Supplement: Supplementary file 1 [file 270339c997293ca2988c62f4308e389f-Supplemental-Conference.zip]

Archive with 1 entries (1 files):
- appendix_of_228.pdf
